# Supplementary material for: Carrier screening by next‐generation sequencing: health benefits and cost effectiveness
Source: PubMed Central journal article supplement (PMC4867563; doi:10.1002/mgg3.204), 2016-01-29

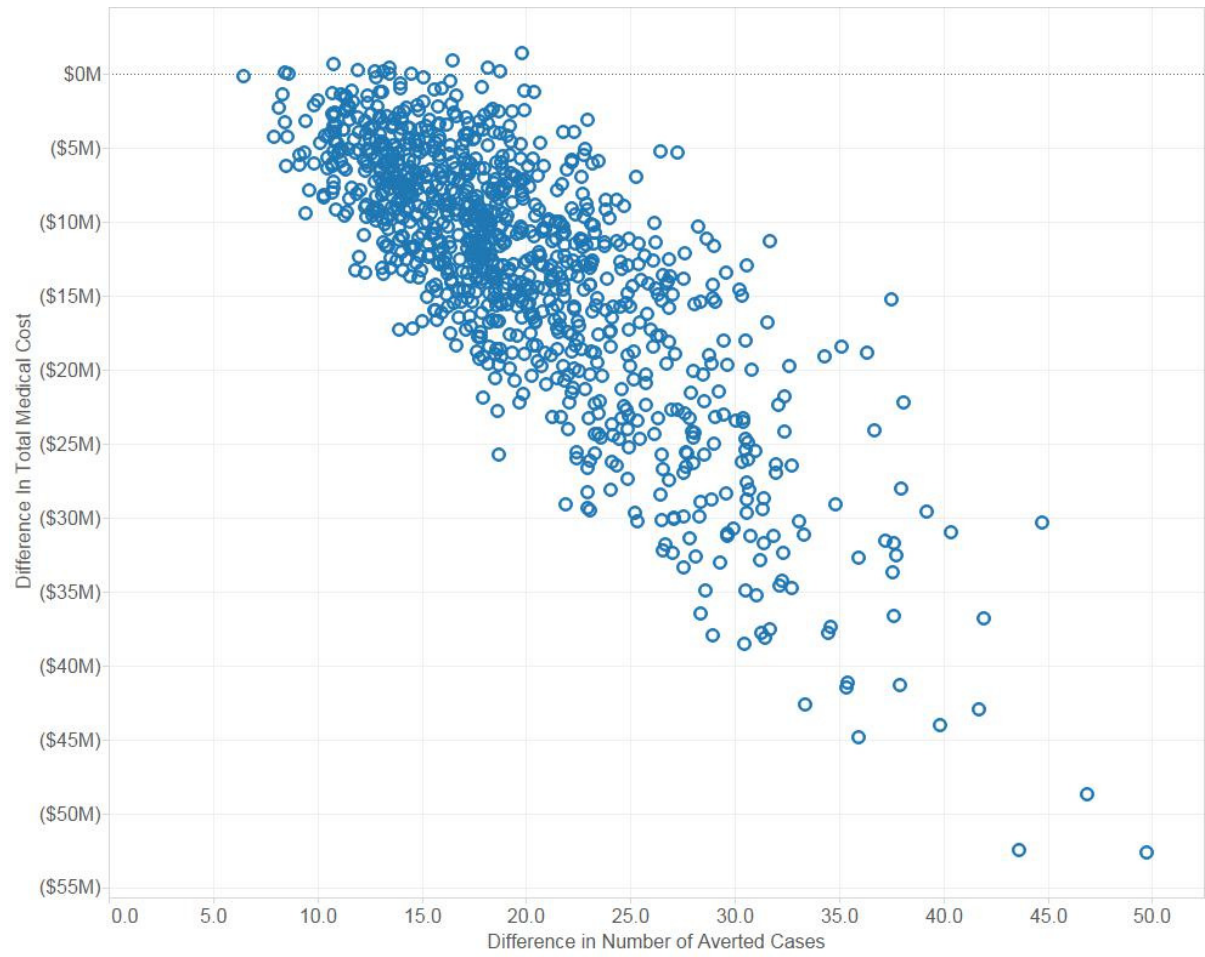

Supplement: MGG3-4-292-s004.pdf [file MGG3-4-292-s004.pdf]
